# Supplementary material for: The systemic immune-inflammation index was non-linear associated with all-cause mortality in individuals with nonalcoholic fatty liver disease
Source: PubMed Central journal article supplement (PMC10115001; doi:10.1080/07853890.2023.2197652), 2023-04-13

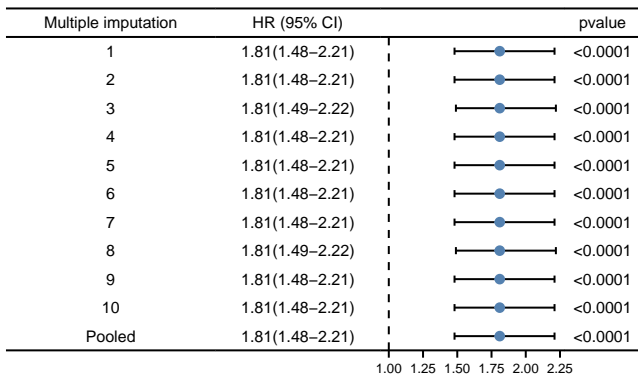

Supplement: IANN_A_2197652_SM8067.pdf [file IANN_A_2197652_SM8067.pdf]
